# Supplementary material for: Human Papillomavirus-Associated Giant Clear Cell Acanthoma and Squamous Cell Carcinoma: A Rare Case Report and Literature Review
Source: MDPI journal article supplement (doi:10.3390/jcm13092482), 2024-04-24
Supplement: s1 [file s1]

**Table S1.** Literature research strategy.

| Pubmed Search Formula                                                                                                                                                                                                                                                                                              |
|--------------------------------------------------------------------------------------------------------------------------------------------------------------------------------------------------------------------------------------------------------------------------------------------------------------------|
| Search: ((human papillomavirus) OR (HPV,)) OR (clear cell acanthoma) OR (squamous cell carcinoma) OR (skin cancer) OR (HPV-associated skin lesions) OR (clear cell acanthoma) OR (lear cell acanthosis) OR (Degos acanthoma) OR (glycogen-rich acanthoma)                                                          |
| Web of Science/EMBASE                                                                                                                                                                                                                                                                                              |
| ((ALL = (human papillomavirus)) OR ALL = (HPV)), AND ALL = (lear cell acanthoma)) AND ALL = (squamous cell carcinoma) OR ALL = (skin cancer) OR ALL = (HPV-associated skin lesions) OR ALL = (clear cell acanthoma) OR ALL = (clear cell acanthosis) OR ALL = (Degos acanthoma) OR ALL = (glycogen-rich acanthoma) |
| Scopus                                                                                                                                                                                                                                                                                                             |
| TITLE-ABS-KEY ((human OR papillomavirus, OR hpv, OR clear OR cell OR acanthoma, OR squamous OR cell OR carcinoma, OR skin OR cancer, OR hpv-associated OR skin OR lesions, OR clear OR cell OR acanthoma, OR clear OR cell OR acanthosis, OR degos OR acanthoma, OR glycogen-rich OR acanthoma))                   |

**Table S2.** Analyzed manuscripts—NR = not registered; pts = patients.

| Author                 | Sample Type                      | Country           | Age                 | Type of Assessment                                                         |
|------------------------|----------------------------------|-------------------|---------------------|----------------------------------------------------------------------------|
| Parson et al., 1997    | Case report                      | USA               | 60 years old        | Surgical excision                                                          |
| Ramoz et al., 2022     | Case series (4 pts)              | Colombia, Algeria | NR                  | Molecular investigation on chromosome 17q25 of verruciform lesions         |
| Forslund et al., 2003  | Case series (51 pts)             | Australia         | NR                  | PCR to research HPV genoma                                                 |
| Harwood et al., 2004   | 124 samples by 77 pts            | Great Britain     | NR                  | HPV detection in normal skin, benign and malignant conditions              |
| Nindl et al., 2007     | Case series 75 pts               | Germany           | 57–58 years old     | Viral PCR in human papillomas                                              |
| Rohwedder et al., 2008 | Case series (9 pts)              | Germany           | 44–85 years old     | PCR and direct sequencing of HPV in melanomas and non-melanoma skin cancer |
| Waterboer et al., 2008 | 120 patients                     | Germany           | NR                  | Association of acanthoma and carcinoma                                     |
| Moody et al., 2010     | Review (149 manuscripts)         | USA               | -                   | Review on pathways of transformation                                       |
| Bouwes et al., 2010    | Multicentric (1534 pts)          | Netherlands/Italy | NR                  | Questionnaire and physical examination                                     |
| D'Antonio et al., 2011 | Case report                      | Italy             | 44 years old        | Immunohistochemical                                                        |
| Forman et al., 2012    | Comprehensive review             | France            | -                   | Literature search                                                          |
| Farzan et al., 2013    | Population study (1066 patients) | USA               | 25–74 years old     | Interview and serology using venous blood samples                          |
| Chesson et al., 2014   | Commentary                       | USA               | NR                  | Author analysis                                                            |
| Kim et al., 2014       | Case series (47 pts)             | Korea             | 64–79 years old     | Immunohistochemistry expression on squamous cell carcinomas                |
| Kuma et al., 2015      | Case series (2 pts)              | Japan             | 43 and 82 years old | Histopathological examination                                              |
| Svajdler et al., 2016  | Series of 169 specimens          | Czech Republic    | 43–96 years old     | PCR on specimens                                                           |
| Symer et al., 2018     | Narrative review                 | USA               | NR                  | Literature analysis                                                        |

|                           |                                     |               |                     |                                                          |
|---------------------------|-------------------------------------|---------------|---------------------|----------------------------------------------------------|
| Mahal et al., 2019        | Epidemiologic study (12,017 pts)    | USA           | 25–65 years old     | Database analysis                                        |
| Chera et al., 2019        | Case series (103 pts)               | USA           | 60 years old (mean) | ctHPV16DNA dPCR assay                                    |
| Gao et al., 2019          | NR                                  | China         | NR                  | RT-PCR and MTT assay on the specimen                     |
| Conforti et al., 2019     | -                                   | Italy         | -                   | Communication                                            |
| Kombe, Kombe et al., 2020 | Narrative review; 164 manuscripts   | China/India   | NR                  | Literature analysis                                      |
| Szymonowicz et al., 2020  | Epidemiological analysis            | USA           | 9–45 years old      | Database analysis                                        |
| Eich et al., 2020         | 102 pts                             | USA           | 50–76 years old     | Immunohistochemical analysis on squamous cell carcinomas |
| Bandolin et al., 2020     | Review on 86 manuscripts (1922 pts) | Italy/France  | NR                  | Literature analysis                                      |
| Shamseddine et al., 2021  | NR                                  | USA           | NR                  | Literature analysis                                      |
| Balaji et al., 2022       | Review on 75 manuscripts            | India         | 15–44 years old     | Metanalysis of literature data                           |
| Neagu et al., 2023        | Review (2284 pts)                   | Italy/Romania | 49–78 years old     | Literature analysis                                      |
